# Supplementary material for: Is feedback to medical learners associated with characteristics of improved patient care?
Source: Perspect Med Educ. 2017 Aug 29;6(5):319–24. doi: 10.1007/s40037-017-0375-8 (PMC5630536; doi:10.1007/s40037-017-0375-8)
Supplement: Supplementary file 4 — Table 4 Participants and setting (n = 27) [file 40037_2017_375_MOESM4_ESM.docx]

| **Parameter** | **Sample n (%)** |
| --- | --- |
| *# Disciplines and institutions* |  |
| - One discipline at one institution20,22-26,28-31,36,38-42,44,45 | 18 (67%) |
| - Medical students at one school21,27,34,37 | 4 (15%) |
| - One discipline at multiple institutions32,33,35 | 3 (11%) |
| - Multiple disciplines at one instituion19,43 | 2 (7%) |
| *Type of learner* |  |
| - Internal medicine residents19,20,22-25,28,29,31,32,38,39,42,44,45 | 15 (56%) |
| - Medical students21,27,34,37 | 4 (15%) |
| - Pediatric residents35,40 | 2 (7%) |
| - Family Medicine residents41 | 1 (4%) |
| - Pathology residents26 | 1 (4%) |
| - Emergency medicine residents33 | 1 (4%) |
| - Gastroenterology fellows30 | 1 (4%) |
| - Internal medicine and surgery residents43 | 1 (4%) |
| - Unclear36 | 1 (4%) |
| *Setting* |  |
| - Academic medical center19,21-28,30-33,35-41,43-45 | 24 (89%) |
| - Veterans Affairs teaching hospital20,29 | 2 (7%) |
| - Outpatient multi-specialty practice42 | 1 (4%) |
| *Location* |  |
| - United States20-26,28,29,31-33,35,37-45 | 22 (81%) |
| - United Kingdom27,34 | 2 (7%) |
| - Canada19 | 1 (4%) |
| - Greece36 | 1 (4%) |
| - Korea30 | 1 (4%) |

**Table 4.** Participants and setting (n=27)
